# Supplementary material for: Highly selective room temperature ammonia gas sensors based on d-band C-SnO2 and response behavior induced by oxidative and reductive role shifts
Source: Royal Society of Chemistry journal article supplement (doi:10.1039/d3ta01426f), 2023-01-01
Supplement: d3ta01426f1.pdf [file d3ta01426f1.pdf]

**Highly selective room temperature ammonia gas sensors  
based on d-band C-SnO<sub>2</sub> and response behavior induced by  
oxidative and reductive role shifts**

*Hongmin Zhu<sup>a</sup>, Hanyang Ji<sup>a</sup>, Zhenyu Yuan<sup>a, b, c, d \*</sup>, Yanbai Shen<sup>e</sup>, Hongliang Gao<sup>a</sup>,*

*b, c, d, Fanli Meng<sup>a, b, c, d \*</sup>*

- a. College of Information Science and Engineering, Northeastern University,  
Shenyang 110819, China
- b. Hebei Key Laboratory of Micro-Nano Precision Optical Sensing and  
Measurement Technology, Qinhuangdao, 066004, China
- c. National Frontiers Science Center for Industrial Intelligence and Systems  
Optimization, Northeastern University, Shenyang 110819, China
- d. Key Laboratory of Data Analytics and Optimization for Smart Industry  
(Northeastern University), Ministry of Education, China
- e. School of Resources and Civil Engineering, Northeastern University, Shenyang  
110819, China

\*Corresponding authors: Fanli Meng (mengfanli@ise.neu.edu.cn), Zhenyu Yuan  
(yuanzhenyu@ise.neu.edu.cn).

## 1. Experiment

### 1.2. Computation method and model

The electronic structure of the material and the interaction of the material with the gas are analyzed through density functional theory. The Dmol3 code was also used to calculate the adsorption energy of the target gas on the material with the Basis set as DND. The electron exchange correlations were established via GGA (generalized gradient approximation) and PEB (Perdew Burke enzehr) models [1, 2]. The (110) face is the most stable face of SnO<sub>2</sub> and an important site for catalysis and gas sensitization [3, 4]. Therefore, the cleave surface of the SnO<sub>2</sub> calculation model was chosen to be the (110) face, as shown in Fig. S3. 3 x 2 supercell models were adopted with vacuum thickness of 15 Å, K-point grid of 1 x 1 x 1, smearing of 0.005 Ha and global orbital cutoff of 4.0 Å. The model energy was set to 1 x 10<sup>5</sup> Ha, the force converge was set to 0.002 Ha/Å and the displacement was set to 0.005 Å. In every model, bottom layer is fixed and rest all layers and adsorbate are fully relaxed.

The adsorption energy of the target gas on the material was calculated through equation (2) [5].

$$E_{ads} = E_{materials + gas} - E_{materials} - E_{gas} \quad (2)$$

Where  $E_{materials+gas}$ ,  $E_{materials}$  and  $E_{gas}$  were system energy of material adsorption gas, material system energy and gas molecular energy, respectively.

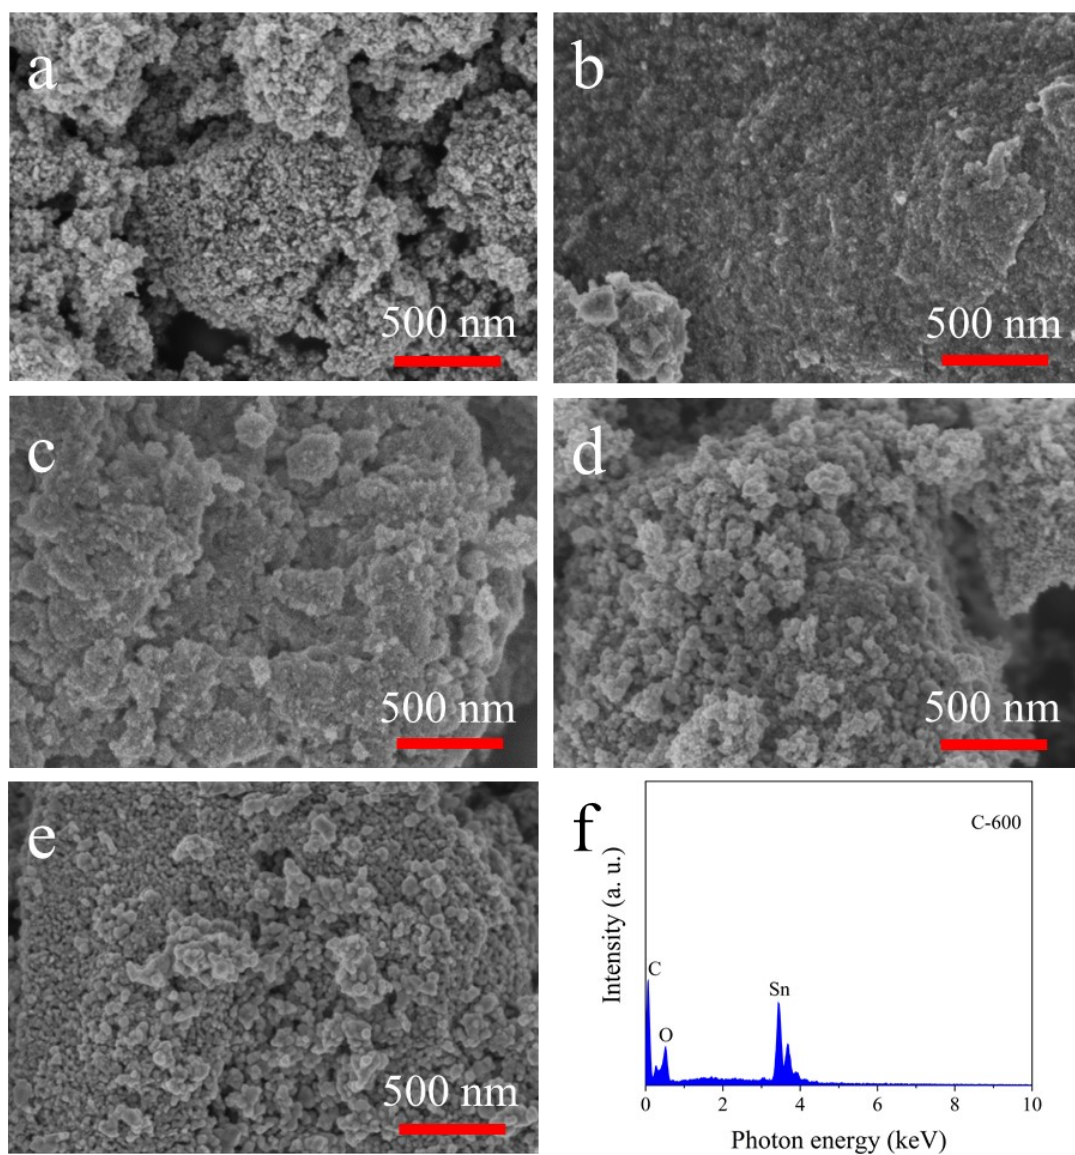

Fig. S1. SEM of (a) W-600, (b) C-300, (c) C-500, (d) C-600, and (e) C-800, and (f) DES of C-600.

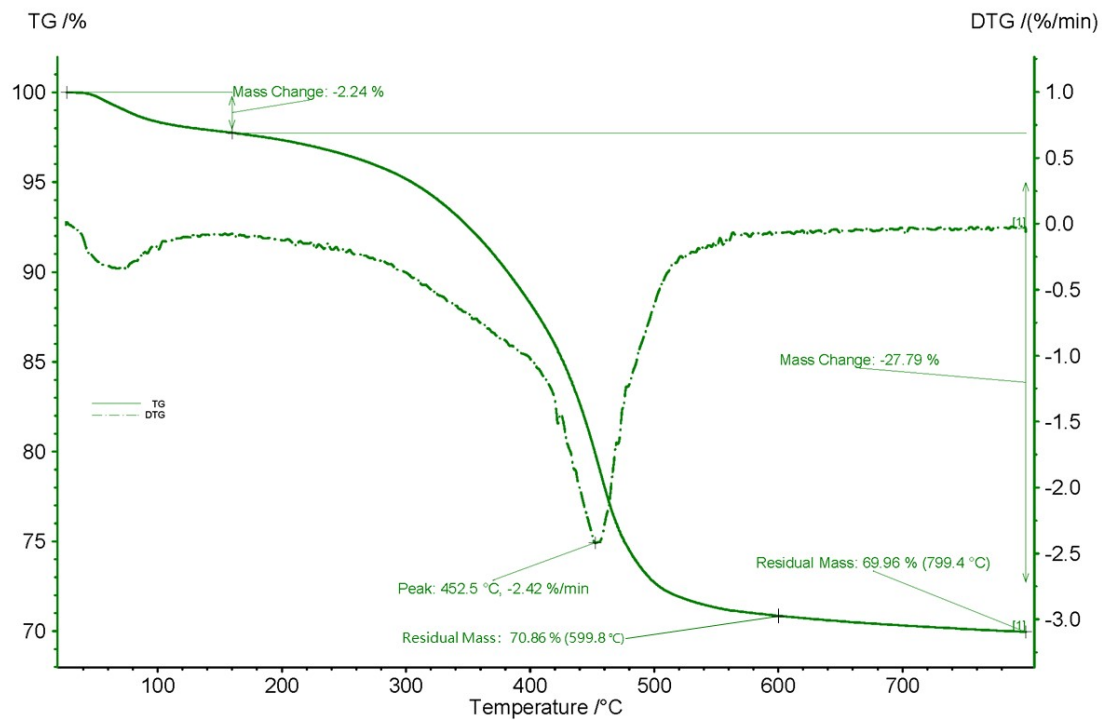

Fig.S2. TG and DTG curves of C and Sn complex precursor materials.

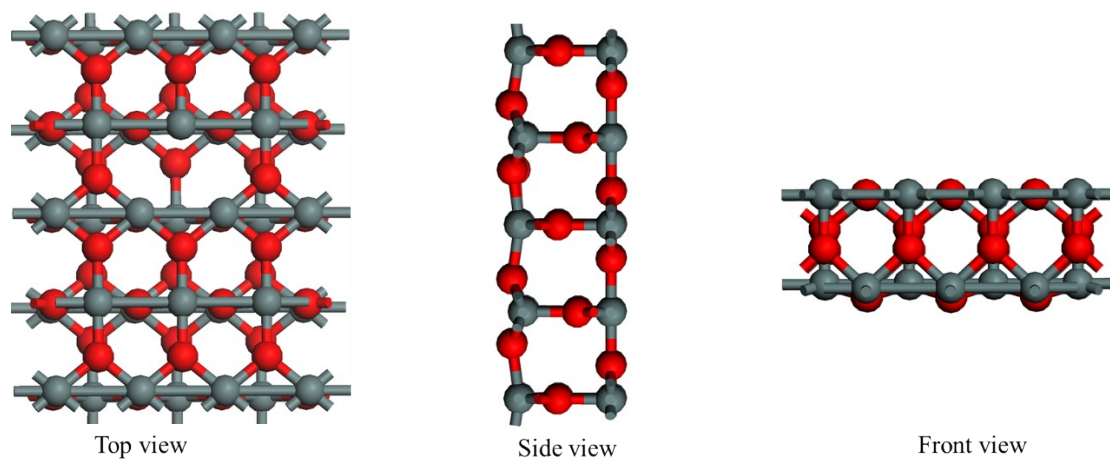

Fig.S3. Three views of the SnO<sub>2</sub> (110) surface crystal model.

Tab.S1. The gap between the HOMO of the material and the LUMO of NH<sub>3</sub>, and the HOMO of the materials. And the gap between the LUMO of the material and the HOMO of NH<sub>3</sub>, and the LUMO of the materials.

| Configuration       | HOMO   | LUMO of NH <sub>3</sub> -HOMO | LUMO   | LUMO-HOMO of NH <sub>3</sub> |
|---------------------|--------|-------------------------------|--------|------------------------------|
| NH <sub>3</sub>     | -5.624 |                               | 0.349  |                              |
| SnO <sub>2</sub>    | -3.425 | 3.774                         | -3.220 | 2.404                        |
| C1-SnO <sub>2</sub> | -3.422 | 3.771                         | -3.113 | 2.511                        |
| C2-SnO <sub>2</sub> | -3.423 | 3.772                         | -3.112 | 2.512                        |
| C3-SnO <sub>2</sub> | -3.421 | 3.770                         | -3.112 | 2.512                        |
| C4-SnO <sub>2</sub> | -3.439 | 3.788                         | -3.081 | 2.543                        |
| C5-SnO <sub>2</sub> | -3.668 | 4.017                         | -3.521 | 2.103                        |

Tab.S2. The gap between the HOMO of the material with -COOH and the LUMO of NH<sub>3</sub>, and the HOMO of the materials with -OCOO-. And the gap between the LUMO of the material with -COOH and the HOMO of NH<sub>3</sub>, and the LUMO of the materials with -OCOO-.

| Configuration              | HOMO   | LUMO of NH <sub>3</sub> -HOMO | LUMO   | LUMO-HOMO of NH <sub>3</sub> |
|----------------------------|--------|-------------------------------|--------|------------------------------|
| SnO <sub>2</sub> -OCOO-    | -3.933 | 4.282                         | -3.427 | 2.197                        |
| C1-SnO <sub>2</sub> -OCOO- | -3.909 | 4.258                         | -3.437 | 2.187                        |
| C2-SnO <sub>2</sub> -OCOO- | -3.909 | 4.258                         | -3.437 | 2.187                        |
| C3-SnO <sub>2</sub> -OCOO- | -3.920 | 4.269                         | -3.375 | 2.249                        |
| C4-SnO <sub>2</sub> -OCOO- | -3.920 | 4.269                         | -3.375 | 2.249                        |
| C5-SnO <sub>2</sub> -OCOO- | -3.850 | 4.199                         | -3.628 | 1.996                        |

Tab.S3. The gap between the HOMO of the material with -COOH and the LUMO of NH<sub>3</sub>, and the HOMO of the materials with -COOH. And the gap between the LUMO of the material with -COOH and the HOMO of NH<sub>3</sub>, and the LUMO of the materials with -COOH.

| Configuration              | HOMO   | LUMO of NH <sub>3</sub> -HOMO | LUMO   | LUMO-HOMO of NH <sub>3</sub> |
|----------------------------|--------|-------------------------------|--------|------------------------------|
| SnO <sub>2</sub> -OCOO-    | -3.503 | 3.852                         | -3.286 | 2.338                        |
| C1-SnO <sub>2</sub> -OCOO- | -3.505 | 3.854                         | -3.171 | 2.453                        |
| C2-SnO <sub>2</sub> -OCOO- | -3.501 | 3.850                         | -3.247 | 2.377                        |
| C3-SnO <sub>2</sub> -OCOO- | -3.502 | 3.851                         | -3.248 | 2.376                        |
| C4-SnO <sub>2</sub> -OCOO- | -3.505 | 3.854                         | -3.171 | 2.453                        |
| C5-SnO <sub>2</sub> -OCOO- | -3.737 | 4.086                         | -3.481 | 2.143                        |

## References

- [1] W. Yu, J. Zhang, T. Peng, New insight into the enhanced photocatalytic activity of N-, C- and S-doped ZnO photocatalysts, *Applied Catalysis B: Environmental*, 181(2016) 220-7.
- [2] H. Tang, L.N. Sacco, S. Vollebregt, H. Ye, X. Fan, G. Zhang, Recent advances in 2D/nanostructured metal sulfide-based gas sensors: mechanisms, applications, and perspectives, *Journal of Materials Chemistry A*, 8(2020) 24943-76.
- [3] G. Li, S. Li, Z.-K. Han, C. Zou, H. Wu, W. Yuan, et al., In Situ Resolving the Atomic Reconstruction of SnO<sub>2</sub> (110) Surface, *Nano Letters*, 21(2021) 7309-16.
- [4] L. Zhang, M. Cong, X. Ding, Y. Jin, F. Xu, Y. Wang, et al., A Janus Fe-SnO<sub>2</sub> Catalyst that Enables Bifunctional Electrochemical Nitrogen Fixation, *Angew Chem Int Ed Engl*, 59(2020) 10888-93.
- [5] J. Zhao, B. Liu, L. Meng, S. He, R. Yuan, Y. Hou, et al., Plasmonic control of solar-driven CO<sub>2</sub> conversion at the metal/ZnO interfaces, *Applied Catalysis B: Environmental*, 256(2019) 117823.
